# Supplementary material for: Transgenic expression of Nix converts genetic females into males and allows automated sex sorting in Aedes albopictus
Source: PubMed Central journal article supplement (PMC8901906; doi:10.1038/s42003-022-03165-7), 2022-03-07
Supplement: 42003_2022_3165_MOESM2_ESM.pdf [file 42003_2022_3165_MOESM2_ESM.pdf]

# **Supplementary Information for Transgenic expression of *Nix* converts genetic females into males and allows automated sex sorting in *Aedes albopictus***

Célia Lutrat, Roenick P. Olmo, Thierry Baldet, Jérémy Bouyer and Eric Marois

Correspondence:

Célia Lutrat

Email: [celia.lutrat@outlook.com](mailto:celia.lutrat@outlook.com)

Eric Marois

Email: [e.marois@unistra.fr](mailto:e.marois@unistra.fr)

## **This PDF file includes:**

Supplementary Notes 1 and 2

Supplementary Figures 1 to 4

Supplementary Tables 1 to 6

## **Other supplementary materials for this manuscript include the following:**

Supplementary Data 1 (separate file): Model output from all statistical analyses and performance assessment

Supplementary Data 2 (separate file): Wing length measurements (Fig. 3b)

Supplementary Data 3 (separate file): qPCR data (Fig. 4)

Supplementary Data 4 (separate file): COPAS data for SM9 line (Fig. 6a)

Supplementary Data 5 (separate file): COPAS data for 1.2G line (Fig. 6b)

Supplementary Data 6 (separate file): COPAS data for 3.1G line (Fig. 6c)

**Supplementary Note 1: Sequence of the *Ae. albopictus* genomic region amplified for cloning *Nix* promoter.**

In the sequence below, *Nix* promoter sequence is included in the 1,916 bp sequence highlighted in grey, the 5' UTR sequence of the *Nix* gene is not highlighted, while the ATG start codon is highlighted in blue.

```
TCGCATTTTATGAGTAAAGGCCATTACTCATATATGGGTAAAGTGCTTTTGG
TAAAAAATGAGTAAATCGATTTACTCATAAATTATAATTTACCGTGTTTACT
TTTCGTCTTTTGTATATTTTGAAGTGTAACTATTTTGTATTTATCATTTAAT
TCATACAAAATTTTGC GTTTATTTTGTAGTTTATTGCAATCTACGAAAATTATT
AATGAATTTTACATGTTTCAAATACTCTTAATCATTTTCCTCCTGGAAAACA
GACCTTCCGAGACGTAGCTCTTTGAAGTTTTCATAATGATCCATGTATGAAAT
TTTCCCCTCCGGCTGTTGTTTCATCGCGCAGTTGTTTCTGTTCTTCCGTTCCCTCG
TTCTTCCGGCGCTTGAAGCCTTGGTGCAGTCGGAAGTGTGGAAAAGACTGAT
ATATTTTATTTACGGTCGTTAATGAAAATGATGCTGTCACTATGGAAGTTA
CCTGCAAATTCATGCTTTTGTAGCCTTTCTTGTAGCTCCACATGATGATTTGT
TGCTCCTGTATTATCTTCGAGTACCAAACCTTGTGAAACGGAAATAATCCATC
GTAAATGAAAATTGAACGGTATCAATTTATCCAGGAAGTACTTACCGATTAA
AATATCAATGTATTTGGGAACCTCGACTCTAATCCGCGTGGGAATCCGATGG
ACGCGGTATCGGTCATTGAACCCGATGCTGAAGGGCCTCGACTGGCTATAGC
GGTGCCGTGAAAATCAAATATCTAAAATTTCCCGATAGTGTTATGATCAGG
GGATCCGCATGCGGCAAGGTAGGCCTACTGCTCATCTTTTGCAGTGTGTTAG
TGTGACTGGCAACGCGACCAGAAGTCTAGTCGAATCCTGCTTGGAAATCGGT
TTGTTTTGTCGATGGGGGTGGCCCGCAAATCGCATTGTGTTGTTTGGGAAGG
CCCGCTCGATGCATGTTAGGTAGGCGTAGTTTGTTCGAGTTTGACGTGCCTGC
ACCCTCCCTGGTTATGATGGCGCACTAATGCATTCCGAGAAAAGTTGCTAACT
TGAAAATTTTCATCCAAATATGGGTAAAGTTCATTTACCCATGTTTGGGTATAG
CGATTTTACCTATAATATGGGCAAATTTGACCGTTTTTCAAAGGTATATTTTA
CCCATATTATGGGTAATGCATATGAAACCCAAATATGGGTAAATCAACTACT
GATCTATGGGTAAACTGATCTTAGCGTGTATGTTTCACACGTGACATTCACTG
GTTTTACAATTGGCTTCTTTAGCAGTGTTGGGATAATTCCATATTATGAATCT
GCATGCCAAACTGGGCCGAAATCCAAATTTTCATCAATTTTGGTGCACGGGA
ACCTATTTAAATATCAATTTGAAGTTTGTATGGGAGCGATTTGTGCAATCACC
CCTCGTTGCATTTTGTACTGGGCGGAGCTGTCAAACAGTTGCCTAGCTGTCAA
AAGGTGATTTGCAATAATCTCTTTGAAATTGATTTTAGGTATCAAATAAAGT
TCTAAAAATCTGAAAAAATCATAGTGGCTCAGAAAAAGGTGCTCTTTCGTA
TAAAATCAAAAAATGAACACTTTTTTCAAATTTAAAAACCCAATTTTCGCAA
ATCTATAGGGCTCTGCACGAAGTTCTCTCCCTCTCTTTCGCTCTCATTGAGATT
TTGTAAACAACAAGGCCAGGAAATGTCAAAATCCCATACAAAATCAAAACA
GTGCAGTGCCCTATATGTAAAACACATCACTCCGACGTGTAAATTTTTTTGAG
TGTTGATTTAATCAAAGTGAATAAAAATATTAGTTTTATGACATACTTGTTTT
CTGAGTGTAGCAAAAATATGAAAACACATTTTGTACTTTGAATGTTAAGCGT
GTATGCTTTTTGTGTCAATATGTCAATTGTTAAACCCATGTTAATAGTTTAAAT
TTTTTTTTAATCAAATCTTTTTTTAAGTAATG
```

**Supplementary Note 2: Male-specific amplification pattern of one of the copies of the *myo-sex* orthologue.**

PCR amplification was performed using primers Myosex369-F and Myosex369-R targeting the end of the first intron of *myo-sex*. The expected product with this primer pair was 997 bp as provided below. The discovered male-specific product carries a 664 bp deletion (highlighted in grey) and is present in genetic males only.

```
AGGCCATACTAACCTTCCGTAAATCACGCGGTTGGCCACTACCGTCAGCACC
ACGATAATGCTGAGTACAAAATTTAGATTTCTTCAACGTGTTGTACAAAATAC
AAAAGCGCGATCGCTCGAGGGCTAAGAATTAATGAAGAAAATTGCAAATCA
ATTACATATTTATACAAAATCATAACAATAGGTATAGATGTTTGCAAAGATGT
TCGTTGACAGCTTGAATCTCGAAACAGAGATGAATAGATTGAACTATAAAAC
AAACTCGATCAAAAATAACACAGCGTAACAAAATAACTTTTTGTATGTCTC
TAGAGCAAACCTTACGTGTCTCCGAAGGATTTTGGGCCGCTGAATCCGAATCT
GGGCTCAGATTTGCTCTAACACGTCACAATTTGAGCTATACCTCAATTTATA
GGGCAAAATATGCGATTTTGGGCTTTTTGACTGCAAGCCATTAAGCAAGGA
AATATTTTTTTAAGCAATCAAAAGGTTAATTGGTCAATTAACATCTAAATTAC
GACTCATGCAAAATATTTTCGTTTTACCAAATCGAATTTGATAGTTTTAAGCGA
TTTATGTTAGGTACGATATTTCCCATATAAGTCAGCCTCCAAAAGTTGCATGC
AAGTTTTTCATGCTAACATAAAATGCTTAAATCCATCAAATTTGATTAGGTA
ACGAAATATTTTGCATGAGTCGTTAATTTAGATGTTAGTTGACCAATTAACCT
TTTGATTGCTTAAAAAAAATATTTCCCTTGCTTAAATGGCTTGCAGTCAAAAAG
CCAAAATCGCATATTTTGCCCTATAAATTGAGGTATAGCTCAAATTTGTGAC
GTGTTAGAGCAAATCTAAGCCCGGATTCGGATTCAGCGGCCCAAAATCCTTC
GGAGACACATAAGTTTGCTCTTGAGACAAAAAAAATGTTGCGCTGTGTAATC
TGTTAAAACATTGTCCTACATTTTTTTCGCTCCATTGTTACTTCATTGTAT
```

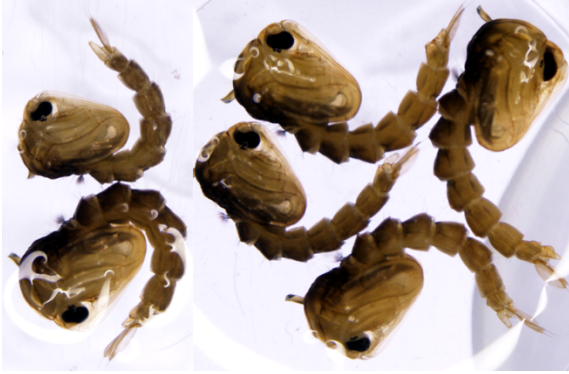

**Supplementary Figure 1: Intersex phenotypes in SM9 line prior to purification.** The two pupae on the left side of the picture are a control male and a control female from SM9 line. All four pupae on the right are representative GFP-expressing intersex individuals with deformed genitalia found in the SM9 line prior to elimination of additional non-fully masculinizing transgene insertions. Pictures were taken under a binocular microscope with white light.

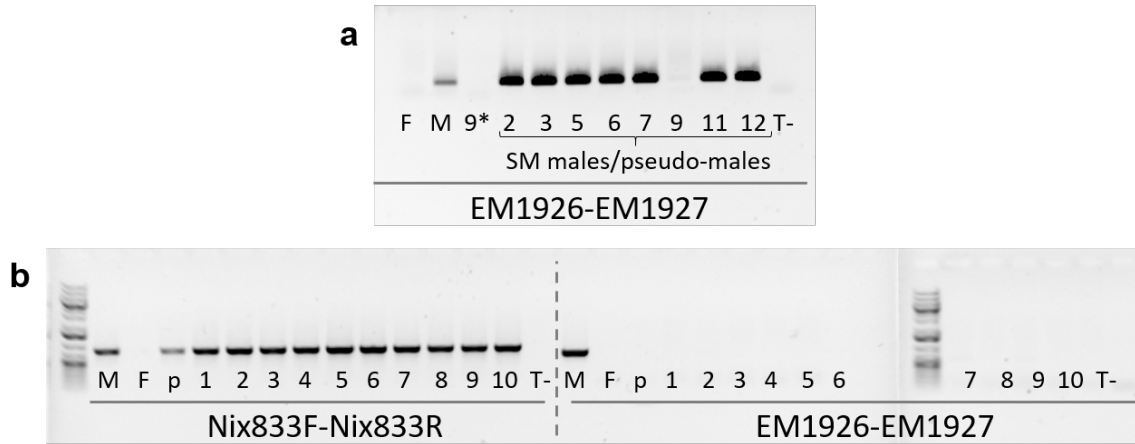

**Supplementary Figure 2: Detection of lines composed exclusively of genetic females in lines carrying the *Nix*-OpIE2-GFP plasmid. a)** PCR amplification of genomic DNA from pooled phenotypic males using primers EM1926-EM1927. This primer pair is located within the second intron of *Nix*, absent from our construct, and thus amplifies only DNA from genetic males. Genomic DNA was extracted from pooled pupae and analysed in the following order: WT females (“F”, negative control), WT males (“M”, positive control), SM9 partially masculinized female (“9\*”), males or pseudo-males from selected lines arising from injection of the first OpIE2-GFP -marked *Nix* expressing plasmid (numbers 2 to 12), negative control without DNA template (“T-“). This PCR allowed identification of line SM9 as composed exclusively of genetic females. **b)** Screening of 10 SM9 individual males (labelled 1 to 10) with primer pair Nix-833F-Nix-833R amplifying any *Nix*-bearing genomic DNA<sup>1</sup> and primer pair EM1926-EM1927 for endogenous *Nix* only. The following controls were used: “M” is WT male positive control, “F” is WT female negative control, “p” is the pooled SM9 male DNA from top panel, and “T-” is a negative control without template DNA. This PCR confirmed that all phenotypic males in the SM9 line were pseudo-males. PCR products were resolved on a 0.8% agarose gel with 0.2µg/mL ethidium bromide.

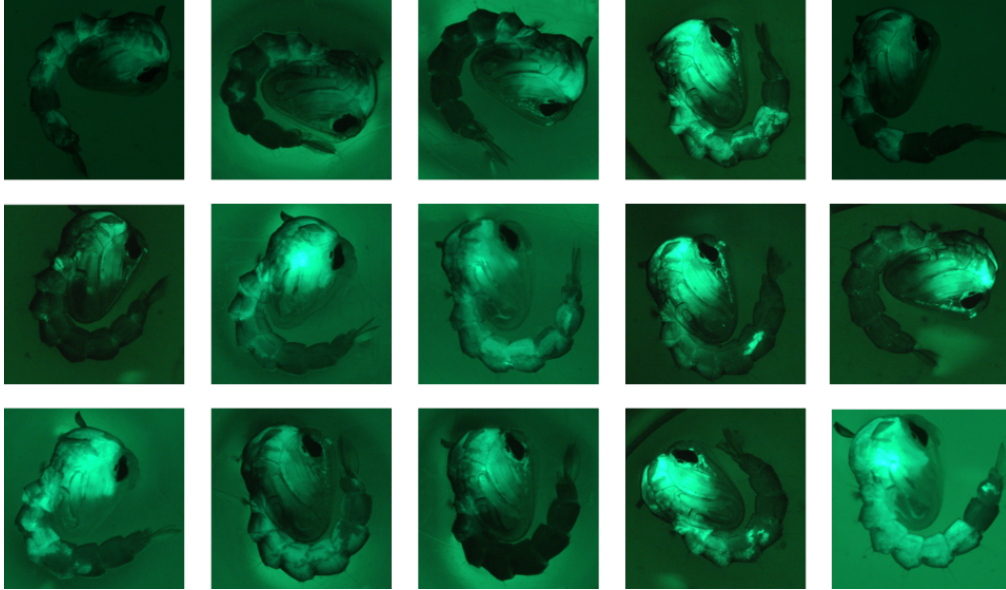

**Supplementary Figure 3: Gallery of male SM9 pupae arising from CRE-injected embryos, showing local demasculinization in the posterior pole. All adults that emerged from these pupae had male heads and female genitalia. Pictures were taken under a binocular fluorescence microscope using a GFP filter.**

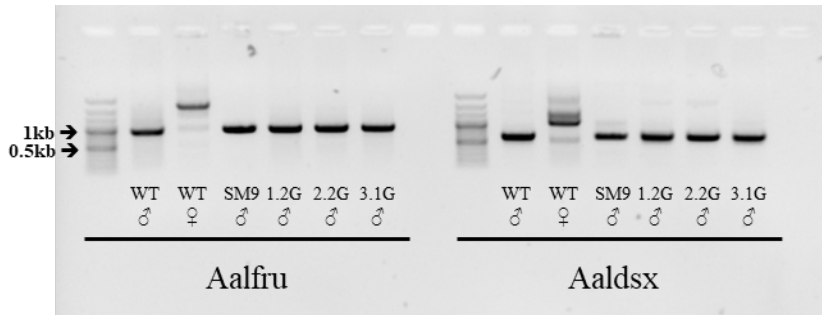

**Supplementary Figure 4: Sex-specific *fruitless* and *doublesex* splicing patterns.** mRNAs from WT male, WT female, SM9 pseudo-male, 1.2G pseudo-male, 2.2G pseudo-male, and 3.1G pseudo-male pupae were extracted, reverse-transcribed into cDNA, which was used for PCR. Products were resolved on a 1.5% agarose gel with 0.2 $\mu$ g/mL ethidium bromide. Left side: RT-PCR with *fruitless* sex-specific primers for which the male product is expected at 987 bp and the female product at 2010 bp. Right side: RT-PCR with *doublesex* primers, for which the male product is expected at 620 bp and the female product at 1062 bp.

**Supplementary Table 1: Sequences of primers used in this study.**

| <b>Name</b>        | <b>5' – 3' sequence</b>  | <b>Use</b>                                                                                                 |
|--------------------|--------------------------|------------------------------------------------------------------------------------------------------------|
| <b>EM1926</b>      | CCCTCAATTTTCCGCCAACTATT  | 655bp amplicon in intron 2 for detection of endogenous <i>Nix</i>                                          |
| <b>EM1927</b>      | AATCTTTGGTGCGCCGTGTC     |                                                                                                            |
| <b>Myosex369-F</b> | AGGCCATACTAACCTTCCGT     | Genomic amplification of a non-coding part of the <i>myo-sex</i> copy from scaffold 369 (end of intron 1). |
| <b>Myosex396-R</b> | ATACAATGAAGTAACAATGGAGCG |                                                                                                            |
| <b>EM2145</b>      | CAAGTTGGTGACGATCCCGA     | For RT-qPCR of mRNA from <i>myo-sex</i> orthologues                                                        |
| <b>EM2146</b>      | GTTGGGTAGAGCAACGGTGA     |                                                                                                            |
| <b>EM2147</b>      | CGCCGGAAAAACGTATCCACT    | For RT-PCR of mRNA from LOC115254984, a candidate <i>myo-fem</i> orthologue                                |
| <b>EM2148</b>      | GCTGGTTCAGGTTAGTTGG      |                                                                                                            |
| <b>EM2149</b>      | CCCGTGCTGAAGAGTTGGAG     | For RT-PCR of mRNA from LOC115254986, a candidate <i>myo-fem</i> orthologue                                |
| <b>EM2150</b>      | GTGGACAGACGTTGCTTAGT     |                                                                                                            |
| <b>EM2151</b>      | GTAGGCATCTACGAGCCCAA     | For RT-PCR of mRNA from LOC109402113, a candidate <i>myo-fem</i> orthologue                                |
| <b>EM2152</b>      | CCAACCTGTACCACTGGCTT     |                                                                                                            |
| <b>EM2153</b>      | CATTGGAAACATTCCCGCCG     | For RT-PCR or RT-qPCR of mRNA from <i>Nix</i>                                                              |
| <b>EM2154</b>      | ACTGCCGGTTTCACATCACA     |                                                                                                            |
| <b>EM2170</b>      | ACGTGCCGAAGAATTGGAAG     | For RT-qPCR of mRNA from LOC109402113, putative <i>myo-fem</i> orthologue                                  |
| <b>EM2171</b>      | TTCTAAGGCAACACACTTCTGA   |                                                                                                            |
| <b>EM2174</b>      | CGTGCCACCCTTCTTGGTAA     | For RT-qPCR of mRNA from LOC115254984, candidate <i>myo-fem</i> orthologue                                 |
| <b>EM2175</b>      | CCTCCAACCTCTTCTGCACGG    |                                                                                                            |



**Supplementary Table 2: Sex ratios of transgenic versus WT lines**

| <b>Line</b> | <b>Replicate</b> | <b>Males</b> | <b>Females</b> |
|-------------|------------------|--------------|----------------|
| WT          | 1                | 125          | 116            |
| WT          | 2                | 128          | 128            |
| WT          | 3                | 74           | 67             |
| SM9         | 1                | 936          | 745            |
| SM9         | 2                | 677          | 590            |
| SM9         | 3                | 430          | 308            |
| 1.2G        | 1                | 889          | 1027           |
| 1.2G        | 2                | 477          | 423            |
| 1.2G        | 3                | 1787         | 1802           |
| 3.1G        | 1                | 1246         | 1224           |
| 3.1G        | 2                | 339          | 306            |
| 3.1G        | 3                | 887          | 641            |

**Supplementary Table 3: Flight ability of SM9 transgenic pseudo-males versus WT males.**

| <b>Line</b> | <b>Replicate</b> | <b>Number failed</b> | <b>Number succeeded</b> |
|-------------|------------------|----------------------|-------------------------|
| <b>WT</b>   | 1                | 55                   | 31                      |
| <b>WT</b>   | 2                | 38                   | 36                      |
| <b>WT</b>   | 3                | 79                   | 11                      |
| <b>SM9</b>  | 1                | 35                   | 41                      |
| <b>SM9</b>  | 2                | 34                   | 65                      |
| <b>SM9</b>  | 3                | 50                   | 14                      |

**Supplementary Table 4: Hatching rate of eggs from the SM9 versus WT lines**

| <b>Replicate</b> | <b>Line</b> | <b>Larvae</b> | <b>Eggs</b> |
|------------------|-------------|---------------|-------------|
| <b>1</b>         | WT          | 373           | 641         |
| <b>2</b>         | WT          | 150           | 309         |
| <b>3</b>         | WT          | 115           | 201         |
| <b>1</b>         | SM9         | 138           | 286         |
| <b>2</b>         | SM9         | 82            | 147         |
| <b>3</b>         | SM9         | 153           | 264         |

**Supplementary Table 5: Fertility of the SM9 versus WT lines**

| <b>Replicate</b> | <b>Line</b> | <b>Number<br/>of<br/>progeny</b> |
|------------------|-------------|----------------------------------|
| 1                | WT          | 2224                             |
| 2                | WT          | 1400                             |
| 3                | WT          | 1581                             |
| 1                | SM9         | 2013                             |
| 2                | SM9         | 1479                             |
| 3                | SM9         | 858                              |

**Supplementary Table 6: Competitiveness of transgenic versus WT males**

| <b>Comparison</b> | <b>Replicate</b> | <b>Number of transgenic progeny</b> | <b>Number of non-transgenic progeny</b> |
|-------------------|------------------|-------------------------------------|-----------------------------------------|
| <b>SM9 vs WT</b>  | 1                | 22                                  | 364                                     |
| <b>SM9 vs WT</b>  | 2                | 129                                 | 1912                                    |
| <b>SM9 vs WT</b>  | 3                | 211                                 | 1540                                    |
| <b>SM9 vs WT</b>  | 4                | 57                                  | 421                                     |
| <b>SM9 vs WT</b>  | 5                | 157                                 | 1401                                    |
| <b>1.2G vs WT</b> | 1                | 586                                 | 2681                                    |
| <b>1.2G vs WT</b> | 2                | 530                                 | 4296                                    |
| <b>1.2G vs WT</b> | 3                | 474                                 | 3571                                    |
| <b>1.2G vs WT</b> | 4                | 187                                 | 1875                                    |
| <b>3.1G vs WT</b> | 1                | 16                                  | 281                                     |
| <b>3.1G vs WT</b> | 2                | 99                                  | 1042                                    |
| <b>3.1G vs WT</b> | 3                | 71                                  | 895                                     |
| <b>3.1G vs WT</b> | 4                | 175                                 | 1165                                    |
| <b>3.1G vs WT</b> | 5                | 73                                  | 710                                     |
