# Supplementary material for: Transgenic expression of Nix converts genetic females into males and allows automated sex sorting in Aedes albopictus
Source: PubMed Central journal article supplement (PMC8901906; doi:10.1038/s42003-022-03165-7), 2022-03-07
Supplement: 42003_2022_3165_MOESM3_ESM.pdf [file 42003_2022_3165_MOESM3_ESM.pdf]

## Description of Additional Supplementary Files

**File name:** Supplementary Data 1

**Description:** Model output from all statistical analyses and performance assessment.

**File name:** Supplementary Data 2

**Description:** Wing length measurements (Fig. 3b).

**File name:** Supplementary Data 3

**Description:** qPCR data (Fig. 4).

**File name:** Supplementary Data 4

**Description:** COPAS data for SM9 line (Fig. 6a).

**File name:** Supplementary Data 5

**Description:** COPAS data for 1.2G line (Fig. 6b).

**File name:** Supplementary Data 6

**Description:** COPAS data for 3.1G line (Fig. 6c).
